# Supplementary material
Source: publisher figshare collection journal article supplement (https://acs.figshare.com/ndownloader/files/7394458)
Supplement: Supplementary file 1 [file 7394458]

## **SUPPORTING INFORMATION**

### **Influence of Adsorbed Water on the Activation Energy of Model Photocatalytic Reactions**

F. Parrino\*<sup>1</sup>, P. Conte<sup>2</sup>, C. De Pasquale<sup>2</sup>, V. A. Laudicina<sup>2</sup>, V. Loddo<sup>1</sup>, L. Palmisano<sup>1</sup>

<sup>1</sup>Dipartimento di Ingegneria Elettrica, Dipartimento di Energia, Ingegneria dell'Informazione, e Modelli Matematici (DEIM), v.le delle Scienze, Edificio 6, 90128 – Palermo, Italy.

E-mails: [francesco.parrino@unipa.it](mailto:francesco.parrino@unipa.it); [vittorio.loddo@unipa.it](mailto:vittorio.loddo@unipa.it); [leonardo.palmisano@unipa.it](mailto:leonardo.palmisano@unipa.it).

<sup>2</sup>Dipartimento di Scienze Agrarie e Forestali, Università degli Studi di Palermo, v.le delle Scienze, Edificio 4, 90128 – Palermo, Italy.

E-mails: [pellegrino.conte@unipa.it](mailto:pellegrino.conte@unipa.it); [claudio.depasquale@unipa.it](mailto:claudio.depasquale@unipa.it); [vitoarmando.laudicina@unipa.it](mailto:vitoarmando.laudicina@unipa.it).

\*Corresponding author: [francesco.parrino@unipa.it](mailto:francesco.parrino@unipa.it), tel. 0039 091 238 63748.

X-ray diffraction patterns of the  $\text{TiO}_2$  samples are shown in Figure S1. Commercial samples show higher crystallinity when compared with the home prepared ones as evidenced by their sharper peaks. The thermal treatment at 773 K for 4 h confers to the HP05C sample higher crystallinity with respect to the HP05 one (60% against 8%).

Merck and Sigma-Aldrich commercial samples consist of pure anatase phase (characteristic patterns, according to JCPDS 21-1272, indicated with circles in Figure S1) and rutile phase (characteristic patterns, according to JCPDS 21-1276, indicated with asterisks in Figure S1), respectively.<sup>1,2</sup> Home prepared samples are mixtures of anatase and rutile.

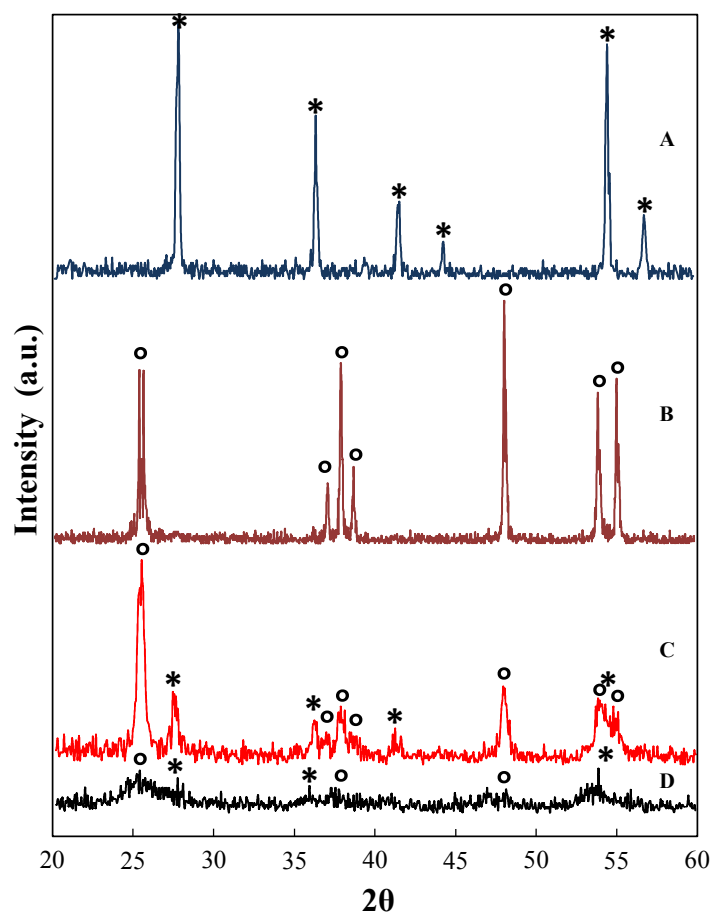

**Figure S1.** XRD patterns of Sigma-Aldrich (A), Merck (B), HP05C (C) and HP05 (D) samples. Asterisks and circles indicate the patterns of rutile and anatase phase, respectively.

The behavior of Merck and Sigma-Aldrich samples could not be satisfactorily described through the Arrhenius model as indicated by the low values of the coefficient of determination  $R^2$  (0.23015 and -0.28227, respectively) reported in the insets of Figure S2. This is probably due to the low SSA of the samples. The  $\tau$  values, reported in Figure S2, were constant for Sigma-Aldrich and increased with temperature in the case of Merck sample.

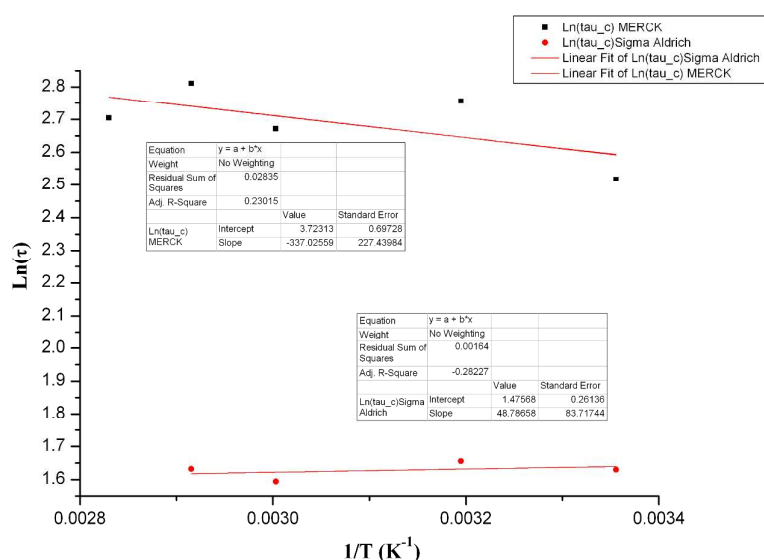

**Figure S2.** Arrhenius graphs reporting the temperature variation of the correlation time ( $\tau$ ) for Merck (black squares) and Sigma Aldrich (red circles) samples.

## References

- (1) Di Paola, A.; Bellardita, M.; Megna, B.; Parrino, F.; Palmisano, L. Photocatalytic Oxidation of Trans-Ferulic Acid to Vanillin on  $TiO_2$  and  $WO_3$ -loaded  $TiO_2$  Catalysts. *Catal. Today* **2015**, 252, 195-200.

(2) Yurdakal, S.; Palmisano, G.; Loddo, V.; Alagöz, O.; Augugliaro, V.; Palmisano, L. Selective Photocatalytic Oxidation of 4-Substituted Aromatic Alcohols in Water with Rutile TiO<sub>2</sub> Prepared at Room Temperature. *Green Chem.* **2009**, *11*, 510-516.
